# Supplementary material for: Discriminating Active from Latent Tuberculosis in Patients Presenting to Community Clinics
Source: PLoS One. 2012 May 30;7(5):e38080. doi: 10.1371/journal.pone.0038080 (PMC3364185; doi:10.1371/journal.pone.0038080)
Supplement: Table S1 — Selected relevant m/z clusters from crude plasma. (XLS) [file pone.0038080.s001.xls]

## Sheet: selected Crude Plasma
ActiveTB vs. All Symptomatic Controls m/z		ActiveTB vs. Symptomatic LATENT Controls		ActiveTB vs. Symptomatic NOLATENT Controls
2869.2		2742.2		4146.9
3066.4		4119.8		4280.6
3215.7		4146.9		4465.9
3314.8		4280.6		4676.9
3423		4443.8		5689
4146.9		4465.9		6185.6
4164.5		6548		7062.6
4280.6		6871.3		8043.2
4343.6		8043.2		8468.7
4465.9		8468.7		8558.3
4536.6		8558.3		8612.1
5689		12575		8982.6
5732.3		12876		9354.8
5743		13784		9506.2
5764.6		16100		10844
5811.3		16326		12575
5907.6		24628		12876
5991.1		24818		13784
6185.6		27762		13995
6312.3		27943		15147
6427.2		29869		15353
6548		30034		15598
6625.5		36918		20409
6832.2		38717		20593
6871.3		56321		24350
7062.6		75536		25050
7983.6		104272		29672
8043.2		105098		29869
8068.9		126406		38717
8171.2		138245		49943
8468.7		142190		50600
8558.3		155364		75536
8612.1		159356		80460
8686.4				89336
8772.8				89775
8982.6				90880
9717.2				100598
11385				104272
11433				105098
11475				105995
11554				111605
11628				118536
11742				119835
12575				121251
12876				122610
13074				138245
13308				143848
13784				145016
13995				149815
15961				155364
16100				163704
16326				164859
18106				167096
18409				169656
18769				172113
20593				176170
20884				180465
22584
22777
24350
24528
24628
24818
25050
25135
25255
25519
27276
27582
27762
27943
29869
30034
31033
32279
32612
36663
36918
38717
38901
39360
41099
41755
46223
46795
49943
50600
55393
75018
75536
101245
121251
126406
133409
138245
142190
155364
159356
