# Supplementary material for: Discriminating Active from Latent Tuberculosis in Patients Presenting to Community Clinics
Source: PLoS One. 2012 May 30;7(5):e38080. doi: 10.1371/journal.pone.0038080 (PMC3364185; doi:10.1371/journal.pone.0038080)
Supplement: Table S2 — Selected relevant m/z clusters from pre-fractionated plasma. (XLS) [file pone.0038080.s002.xls]

## Sheet: selected PreFractionated Plasma
	ActiveTB vs. All Symptomatic Controls	F01	F02	F03	F04	F05	F06
		2774.3	2568.4	27588	8194.8	3303.3	4143.7
		5909.6	3303.1	37359	17520	4461.2	4456.6
		7497.9	7686.7	72844	41324	4532.7	17482
		7675.5	8620.6	150511	56299	4660.5	21266
		9248.3	14906		82335	5065.9	21751
		9460	54136		84666	9012.2	22984
		14256	88464		106898	11655	37694
		14879	93263		142570	29068	45256
		25153				39094	75391
		73133				75489	117705
						89826	145685
						152101	172940
	ActiveTB vs. Symptomatic LATENT Controls	F01	F02	F03	F04	F05	F06
						4461.2
						6860.8
						21123
						39094
	ActiveTB vs. Symptomatic NOLATENT Controls	F01	F02	F03	F04	F05	F06
		2625.3		72844		4461.2	4143.7
		2724.9		150511		4532.7	12726
		2920.1				23075	21266
		4141.8				25472	21751
		12710				39094	37694
		13016				72846
		14256				75489
		14879				142600
		25153
		28078
		28280
		28938
		66500
		95442
		112535
		179916
